# Supplementary material for: Pharmacokinetic Study of Anti-osteoarthritic Compounds of a Standardized Fraction from Sphaeralcea Angustifolia
Source: MDPI journal article supplement (doi:10.3390/ph14070610), 2021-06-25
Supplement: s1 [file s1]

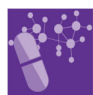

Article

# Pharmacokinetic study of anti-osteoarthritic compounds of a standardized fraction from *Sphaeralcea angustifolia*

Jade Serrano-Román<sup>1,2</sup>, Pilar Nicasio-Torres<sup>1,\*</sup>, Elizabeth Hernández-Pérez<sup>3</sup> and Enrique Jiménez-Ferrer <sup>1,\*</sup>

<sup>1</sup> Centro de Investigación Biomédica del Sur (CIBIS), Instituto Mexicano del Seguro Social (IMSS), Argentina 1, Centro, CP 62790 Xochitepec, Morelos, Mexico piscaliva@yahoo.com.mx (MPN-T); enriqueferrer\_mx@yahoo.com (EJ-F)

<sup>2</sup> Doctorado en Ciencias Biológicas y de la Salud, División de Ciencias Biológicas y de la Salud, Universidad Autónoma Metropolitana Unidad Iztapalapa (UAM-Iztapalapa), San Rafael Atlixco 186, Vicentina, Iztapalapa, CP 09340 Ciudad de México (CDMX), México. jadita\_9@hotmail.com (JS-R).

<sup>3</sup> División de Ciencias Biológicas y de la Salud, Universidad Autónoma Metropolitana Unidad Iztapalapa (UAM-Iztapalapa), San Rafael Atlixco 186, Vicentina, Iztapalapa, CP 09340 CDMX, México. sila@xanum.uam.mx (EH-P).

**Table S1.** Parameters of limit of detection (LOD) and limit of quantification (LOQ) calculated.

| Compound         | Slope of calibration curve (S) | Standard deviation ( $\sigma$ ) | Detection limit (LOD)= $3.3\sigma/S$ | Quantitation limit (LOQ)= $10\sigma/S$ |
|------------------|--------------------------------|---------------------------------|--------------------------------------|----------------------------------------|
| Tomentin         | 162940                         | 3385.90                         | 0.068                                | 0.207                                  |
| Scopoletin       | 165407                         | 6976.26                         | 0.139                                | 0.421                                  |
| Sphaeralcic acid | 7381.9                         | 133.30                          | 0.059                                | 0.180                                  |

Values  $n=6$ .**Table S2.** Recovery capacity of active compounds from plasma extracted in 5 different days.

| Compound   | Nominal concentration ( $\mu\text{g/mL}$ ) | Peak area of compound in solution | Peak area of compound in plasma | Recovery (%) | Mean (%) $\pm$ SD | RSD (%) |
|------------|--------------------------------------------|-----------------------------------|---------------------------------|--------------|-------------------|---------|
| Tomentin   | 2.5                                        | 362298                            | 360010                          | 99.4         | 99.4 $\pm$ 0.40   | 0.40    |
|            |                                            | 370018                            | 369902                          | 100.0        |                   |         |
|            |                                            | 376789                            | 372806                          | 98.9         |                   |         |
|            |                                            | 367656                            | 364397                          | 99.1         |                   |         |
|            |                                            | 362132                            | 360406                          | 99.5         |                   |         |
|            | 5                                          | 846586                            | 811858                          | 95.9         | 96.3 $\pm$ 2.44   | 2.53    |
|            |                                            | 829876                            | 799616                          | 96.4         |                   |         |
|            |                                            | 859980                            | 800692                          | 93.1         |                   |         |
|            |                                            | 840096                            | 808335                          | 96.2         |                   |         |
|            |                                            | 824215                            | 823877                          | 100.0        |                   |         |
|            | 10                                         | 1699392                           | 1568996                         | 92.3         | 96.7 $\pm$ 2.99   | 3.09    |
|            |                                            | 1679123                           | 1626145                         | 96.8         |                   |         |
|            |                                            | 1652019                           | 1650051                         | 99.9         |                   |         |
|            |                                            | 1640822                           | 1622143                         | 98.9         |                   |         |
|            |                                            | 1680087                           | 1602613                         | 95.4         |                   |         |
|            | 20                                         | 3131575                           | 3109042                         | 99.3         | 98.2 $\pm$ 1.22   | 1.24    |
|            |                                            | 3279579                           | 3265492                         | 99.6         |                   |         |
|            |                                            | 3300225                           | 3200110                         | 97.0         |                   |         |
|            |                                            | 3198001                           | 3103140                         | 97.0         |                   |         |
|            |                                            | 3311856                           | 3248992                         | 98.1         |                   |         |
| Scopoletin | 2.5                                        | 350166                            | 338010                          | 96.5         | 97.4 $\pm$ 2.00   | 2.06    |
|            |                                            | 365288                            | 348912                          | 95.5         |                   |         |
|            |                                            | 358065                            | 342806                          | 95.7         |                   |         |
|            |                                            | 355689                            | 354397                          | 99.6         |                   |         |
|            |                                            | 354537                            | 352406                          | 99.4         |                   |         |
|            | 5                                          | 835755                            | 811858                          | 97.1         | 99.2 $\pm$ 1.26   | 1.27    |
|            |                                            | 829366                            | 829616                          | 100          |                   |         |
|            |                                            | 820465                            | 820662                          | 100          |                   |         |
|            |                                            | 828338                            | 828335                          | 100          |                   |         |
|            |                                            | 838300                            | 828877                          | 98.9         |                   |         |
|            | 10                                         | 1584170                           | 1568996                         | 99.0         | 97.3 $\pm$ 1.92   | 1.97    |
|            |                                            | 1681460                           | 1626145                         | 96.7         |                   |         |
|            |                                            | 1669683                           | 1596451                         | 95.6         |                   |         |
|            |                                            | 1699245                           | 1622143                         | 95.5         |                   |         |
|            |                                            | 1599539                           | 1592613                         | 99.6         |                   |         |
|            | 20                                         | 3219863                           | 3122042                         | 98.8         | 98.1 $\pm$ 1.63   | 1.66    |
|            |                                            | 3231392                           | 3165492                         | 98.0         |                   |         |

|                       |    |         |         |       |             |      |
|-----------------------|----|---------|---------|-------|-------------|------|
|                       |    | 3159439 | 3089110 | 98.1  |             |      |
|                       |    | 3454103 | 3303140 | 95.6  |             |      |
|                       |    | 3194902 | 3194881 | 100   |             |      |
|                       |    | 38974   | 38121   | 97.81 |             |      |
|                       |    | 39033   | 37286   | 95.52 |             |      |
|                       | 5  | 37454   | 36048   | 96.25 | 97.4 ± 1.48 | 1.52 |
|                       |    | 39049   | 38557   | 98.74 |             |      |
|                       |    | 38391   | 37926   | 98.79 |             |      |
| Sphaeral-<br>cic acid |    | 75604   | 75066   | 99.3  |             |      |
|                       |    | 74391   | 74197   | 99.7  |             |      |
|                       | 10 | 74276   | 74202   | 99.9  | 99.6 ± 0.35 | 0.35 |
|                       |    | 75007   | 74955   | 99.9  |             |      |
|                       |    | 74503   | 73900   | 99.2  |             |      |
|                       |    | 152030  | 149335  | 98.2  |             |      |
|                       |    | 149202  | 148925  | 99.8  |             |      |
|                       |    | 149976  | 149296  | 99.5  |             |      |
|                       | 20 | 150973  | 148029  | 98.0  | 99.0±0.80   | 0.80 |
|                       |    | 147103  | 146033  | 99.3  |             |      |
|                       |    | 289536  | 287123  | 99.2  |             |      |
|                       |    | 299976  | 296883  | 99.0  |             |      |
|                       | 40 | 299264  | 298637  | 99.8  | 98.8±1.03   | 1.04 |
|                       |    | 298727  | 289892  | 97.0  |             |      |
|                       |    | 290051  | 286889  | 98.9  |             |      |

Mean ± Standard deviance of the Mean; *n* =5.
